# Supplementary material for: Tumor-associated macrophage, angiogenesis and lymphangiogenesis markers predict prognosis of non-small cell lung cancer patients
Source: Springer Nature journal article supplement (doi:10.1186/s12967-020-02618-z), 2020-11-23
Supplement: MOESM2 [file 18615854]

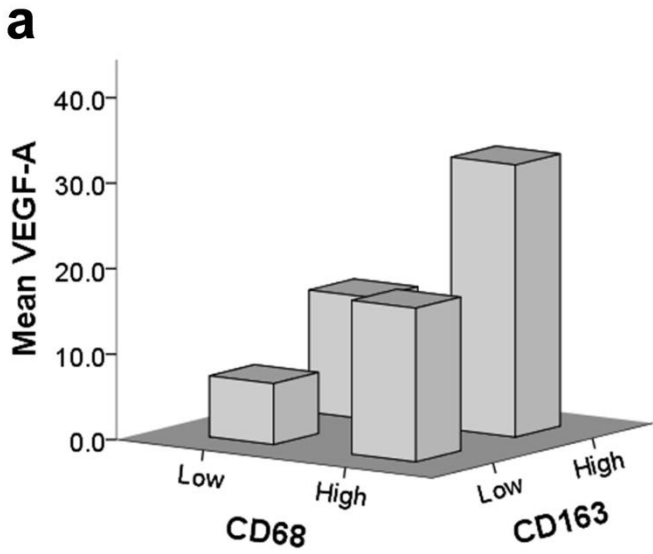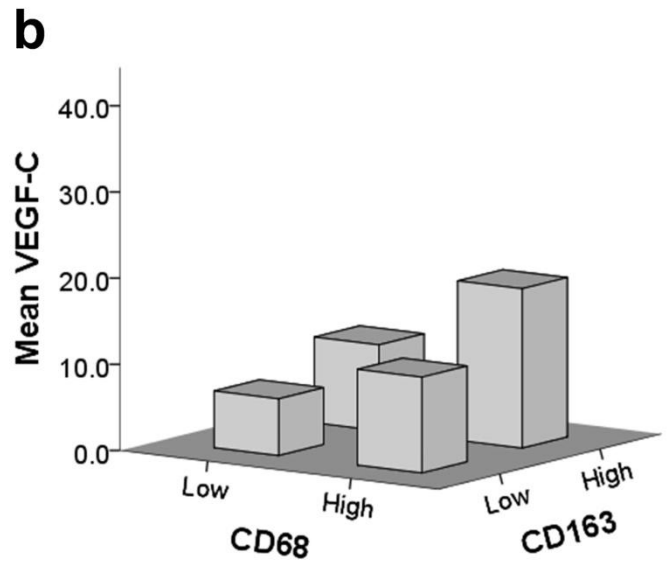

**Supplementary Fig. S1** Association between tumor-associated macrophage and VEGFs in human non-small cell lung cancer (NSCLC). Correlation between tumor-associated macrophage and VEGF-A (**a**) and VEGF-C (**b**).

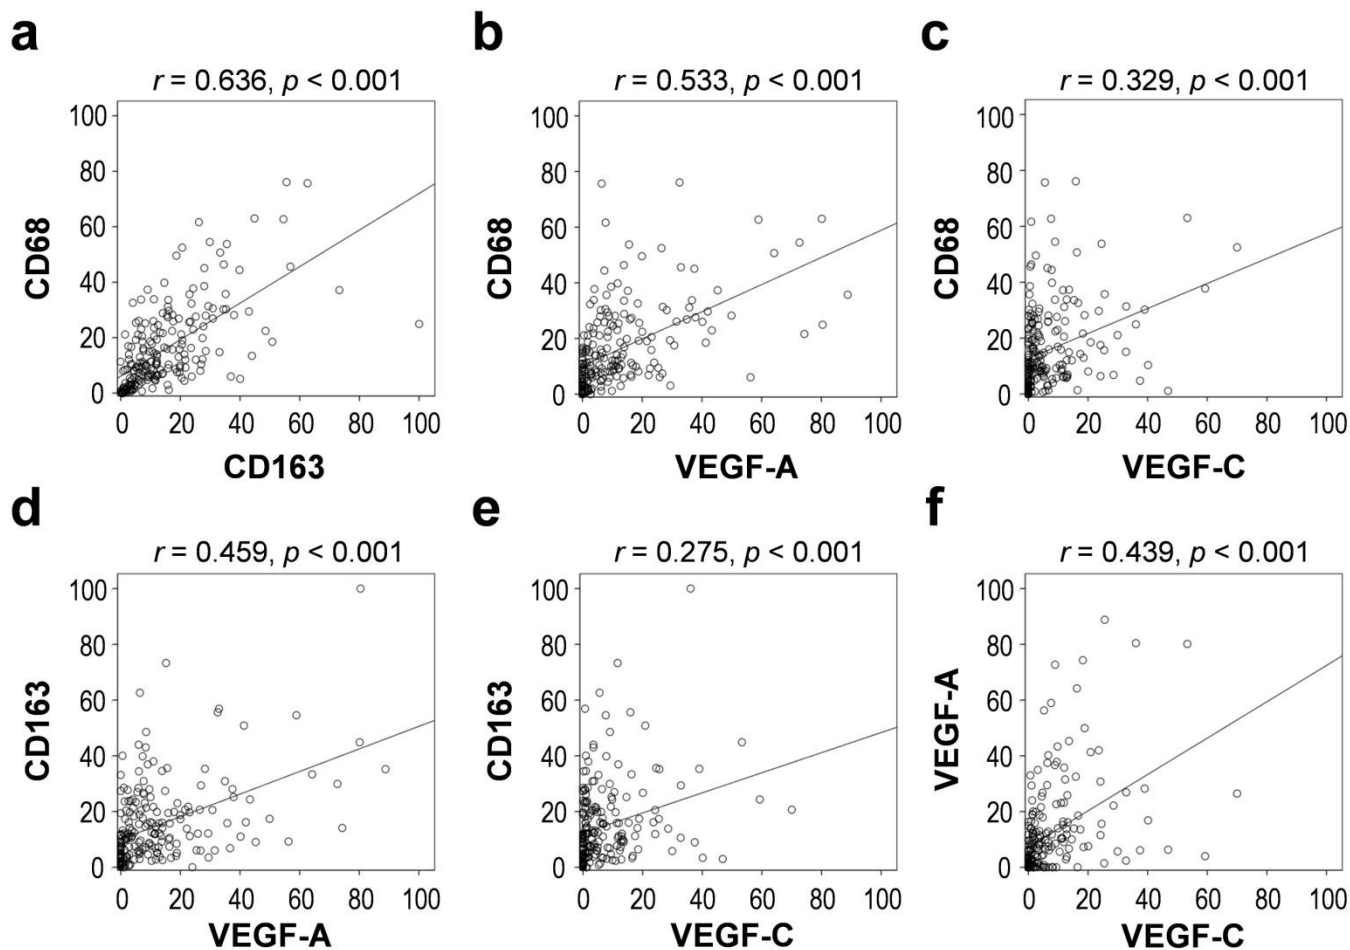

**Supplementary Fig. S2** Correlation among tumor-associated macrophage-, angiogenesis- and lymphangiogenesis-related markers in patients with adenocarcinoma NSCLC. CD68 expression positively correlated with CD163 (a), VEGF-A (b), and VEGF-C (c) expression. CD163 expression showed a significant positive correlation with VEGF-A (d), but a weak correlation with VEGF-C (e) expression. There is a positive correlation between VEGF-A and VEGF-C (f).

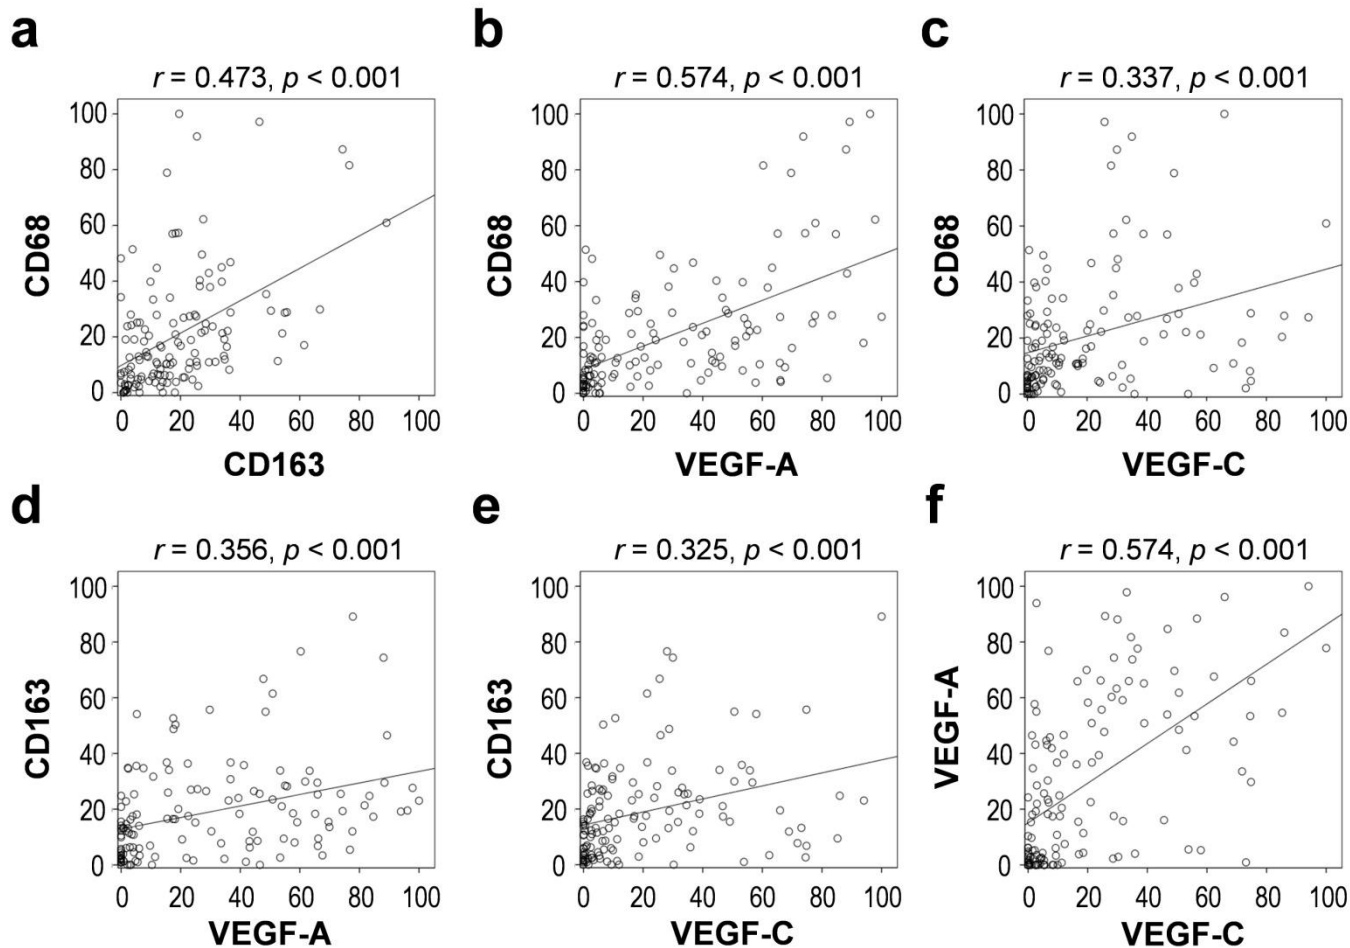

**Supplementary Fig. S3** Correlation among tumor-associated macrophage-, angiogenesis- and lymphangiogenesis-related markers in patients with squamous cell carcinoma NSCLC. CD68 expression positively correlated with CD163 (a), VEGF-A (b), and VEGF-C (c) expression. CD163 expression showed a moderate correlation with VEGF-A (d) and VEGF-C (e) expression. There is a significant positive correlation between VEGF-A and VEGF-C (f).

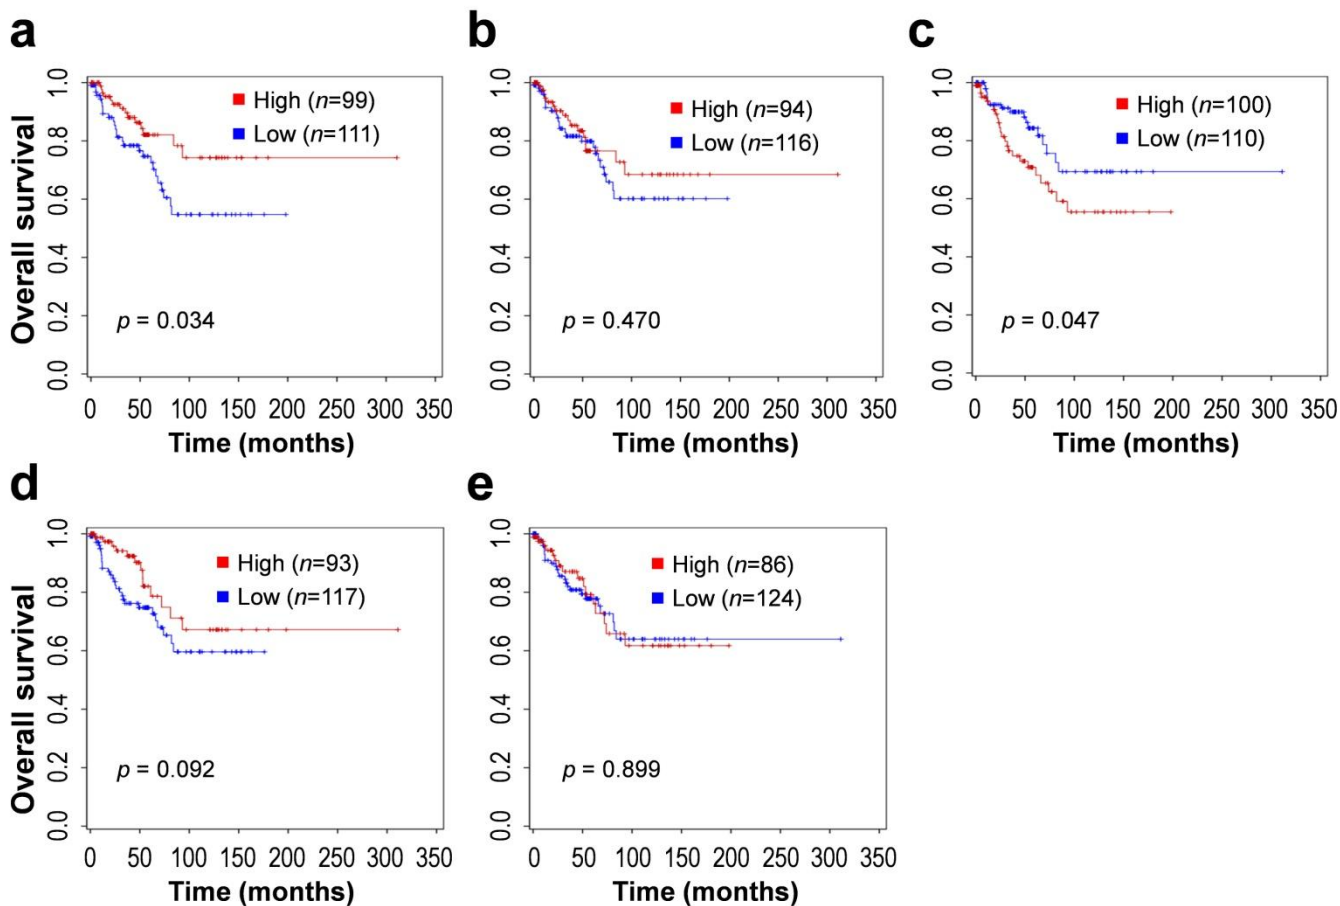

**Supplementary Fig. S4** Kaplan-Meier survival curves for tumor-associated macrophage-, angiogenesis- and lymphangiogenesis-related markers in NSCLC patients with adenocarcinoma. Patients expressing CD68 had better overall survival than patients who did not (OS rate, 85.9% vs. 75.7%, log rank  $p=0.034$ ) (a), while CD163 was not associated with patient survival ( $p=0.470$ ) (b). Patients with a high M2 ratio (CD163/CD68) had significantly shorter overall survival than patients with a low M2 ratio (OS rate, 76.0% vs. 84.5%, log rank  $p=0.047$ ) (c). There were no meaningful overall survival differences for VEGF-A ( $p=0.092$ ) (d) and VEGF-C ( $p=0.899$ ) (e) expression in NSCLC patients.

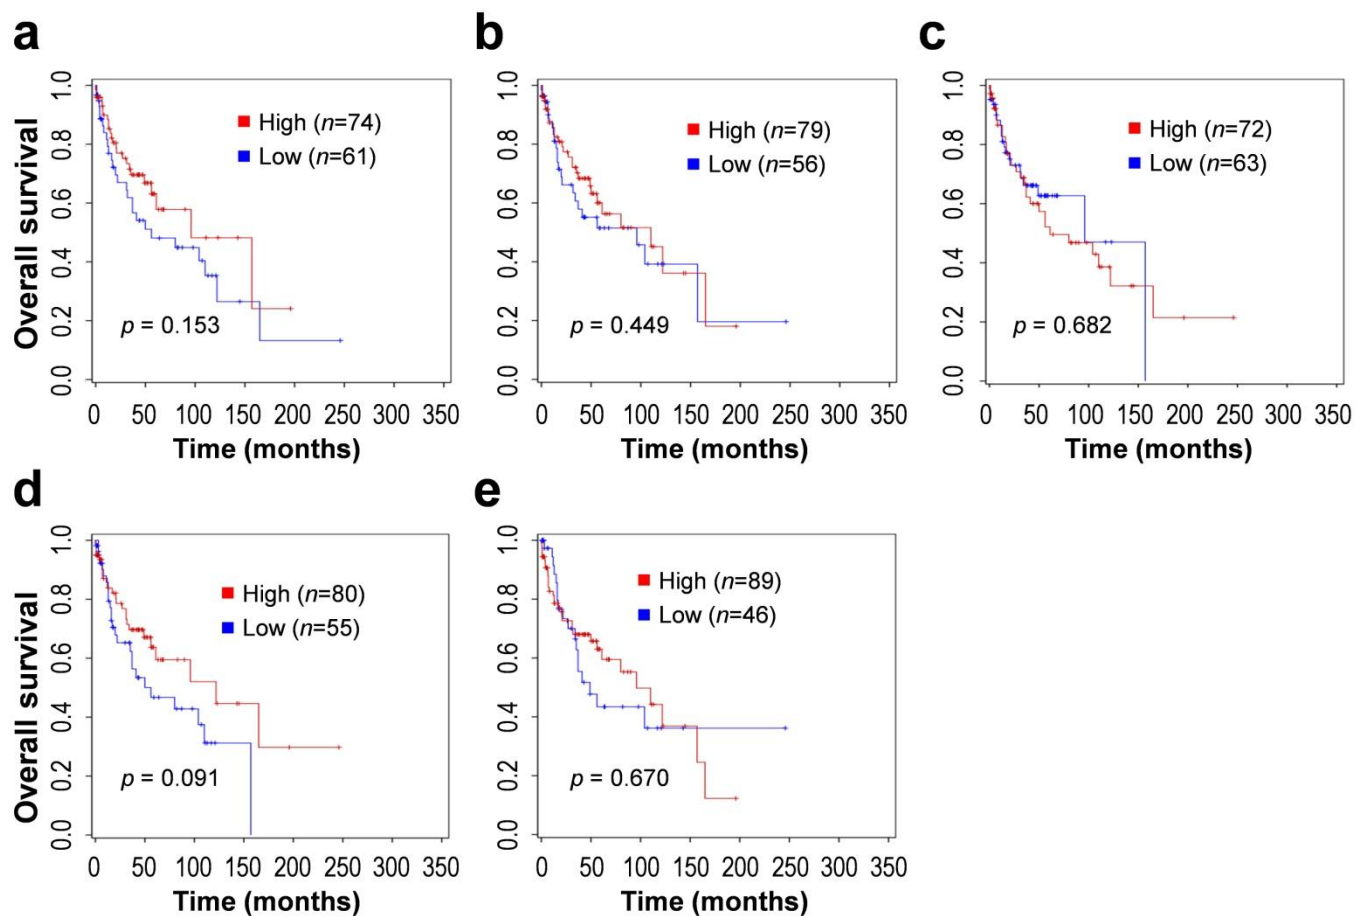

**Supplementary Fig. S5** Kaplan-Meier survival curves for tumor-associated macrophage-, angiogenesis- and lymphangiogenesis-related markers in NSCLC patients with squamous cell carcinoma. There were no meaningful overall survival differences for CD 68 ( $p=0.153$ ) (a), CD163 ( $p=0.449$ ) (b), M2 ratio ( $p=0.682$ ) (c), VEGF-A ( $p=0.091$ ) (d) and VEGF-C ( $p=0.670$ ) (e) expression in NSCLC patients with squamous cell carcinoma.

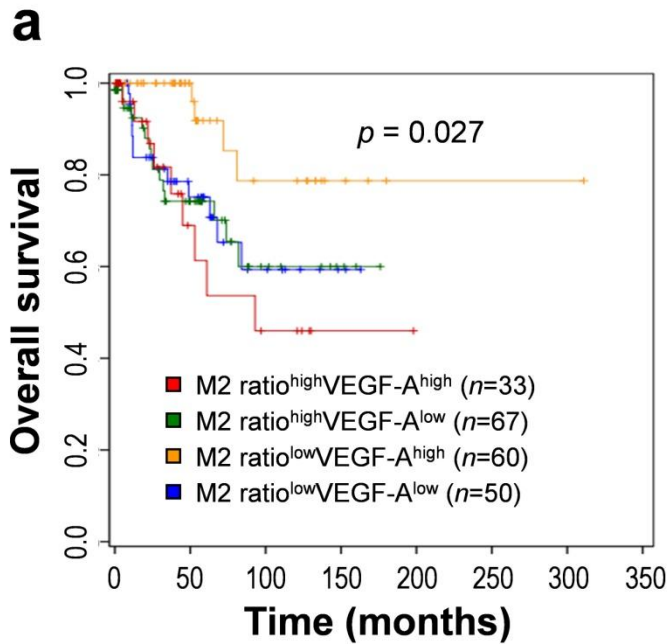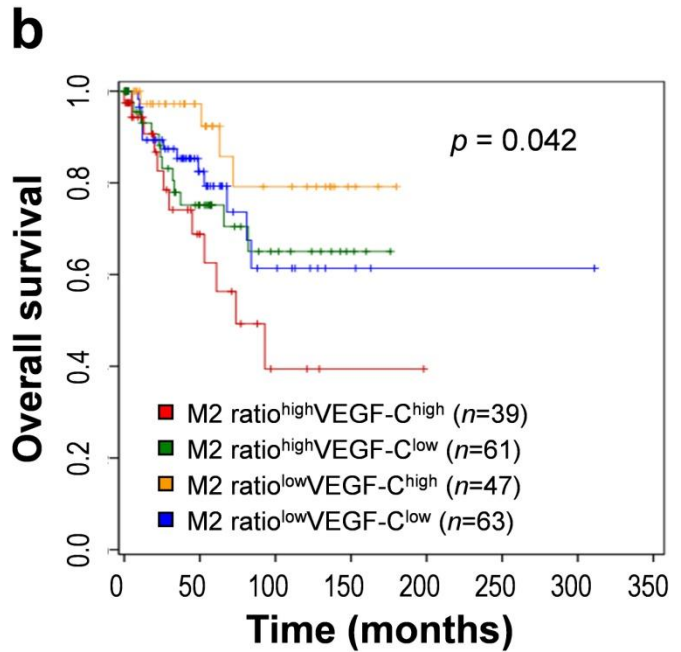

**Supplementary Fig. S6** Survival analysis of NSCLC patients with M2 ratio expression according to angiogenesis (VEGF-A) or lymphangiogenesis (VEGF-C) marker expression in NSCLC patients with adenocarcinoma. Survival differences were observed among 4 NSCLC patient groups classified according to their M2 ratio and VEGF-A expression (log rank  $p=0.027$ ) (a). A significant difference of survival rate was found among 4 NSCLC patient groups classified according to their M2 ratio and VEGF-C expression (log rank  $p=0.042$ ) (b).

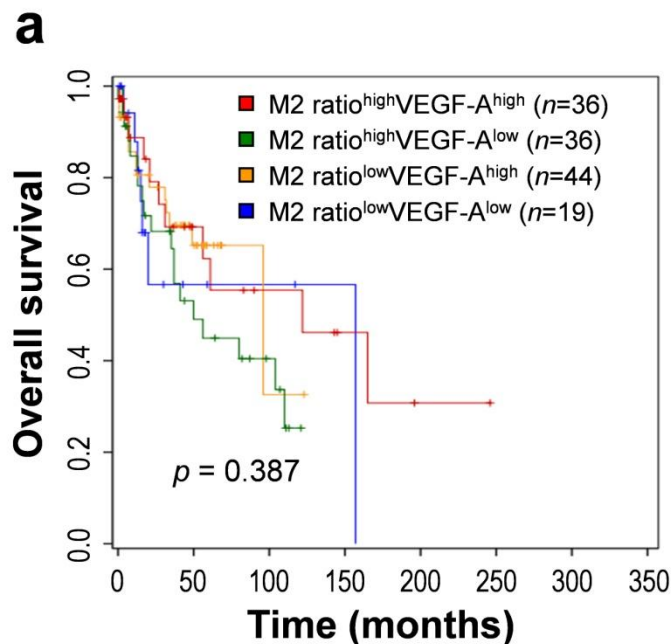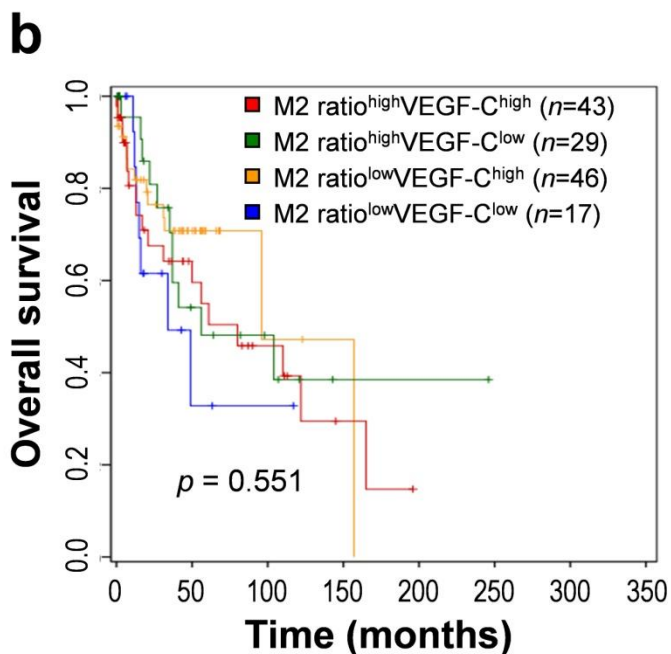

**Supplementary Fig. S7** Survival analysis of NSCLC patients with M2 ratio expression according to angiogenesis (VEGF-A) or lymphangiogenesis (VEGF-C) marker expression in NSCLC patients with squamous cell carcinoma. There were no meaningful overall survival differences for combination M2 ratio and VEGF-A ( $p=0.387$ ) (a) or VEGF-C ( $p=0.551$ ) (b).
